# Supplementary material for: Genome-Wide Association Study on the Content of Nucleotide-Related Compounds in Korean Native Chicken Breast Meat
Source: MDPI journal article supplement (doi:10.3390/ani13182966), 2023-09-20
Supplement: s1 [file s1]

**Table S1.** Number of experimental chickens that make up subgroups separated by generation and sex.

| Generation                 | Male | Female | Total |
|----------------------------|------|--------|-------|
| 1 <sup>st</sup> generation | -    | 158    | 158   |
| 2 <sup>nd</sup> generation | 98   | 94     | 192   |
| 3 <sup>rd</sup> generation | 31   | 65     | 96    |
| 4 <sup>th</sup> generation | 99   | 92     | 191   |
| <b>Total</b>               | 228  | 409    | 637   |

**Table S2.** The mean and standard deviation of subgroups' phenotypic values separated by generation and sex (unit: mM).

| Traits       | Generation                 |                            |                            |                            | Sex           |               |
|--------------|----------------------------|----------------------------|----------------------------|----------------------------|---------------|---------------|
|              | 1 <sup>st</sup> generation | 2 <sup>nd</sup> generation | 3 <sup>rd</sup> generation | 4 <sup>th</sup> generation | Male          | Female        |
| Inosine      | 1.303 ± 0.487              | 0.896 ± 0.402              | 1.164 ± 0.395              | 1.440 ± 0.356              | 1.226 ± 0.430 | 1.186 ± 0.483 |
| IMP          | 3.724 ± 0.891              | 5.438 ± 0.602              | 5.880 ± 0.715              | 5.059 ± 0.553              | 5.369 ± 0.714 | 4.741 ± 1.102 |
| Hypoxanthine | 0.694 ± 0.224              | 0.288 ± 0.097              | 0.269 ± 0.076              | 0.463 ± 0.161              | 0.416 ± 0.166 | 0.451 ± 0.254 |
