# Supplementary material for: Genome-Wide Association Study on the Content of Nucleotide-Related Compounds in Korean Native Chicken Breast Meat
Source: Animals (Basel). 2023 Sep 20;13(18):2966. doi: 10.3390/ani13182966 (PMC10525433; doi:10.3390/ani13182966)
Supplement: Supplementary file 1 [file animals-13-02966-s001.zip › Supplementary Tables S3¿CS5.xlsx]

## Sheet: Table S3
Table S3: Significantly associated Single Nucleotide Polymorphisms (SNPs) of the inosine, IMP, and hypoxanthine.
GWAS result of inosine trait
No.	Chr	SNP ID	Position (bp)	Allele 1	Allele 2	MAF	SNP effect(β)	p-value	-log10(p-value)
1	5	Gga_rs316338889	14370082	C	T	0.47	0.11	5.83313e-27	26.23
2	5	GGaluGA276059	14224765	G	A	0.28	-0.11	1.68986e-21	20.77
3	5	GGaluGA276054	14218116	G	A	0.43	-0.09	6.74262e-17	16.17
4	5	GGaluGA276259	14637136	A	G	0.37	-0.09	7.85462e-17	16.1
5	5	Gga_rs15667335	13904162	T	C	0.42	-0.09	1.82496e-16	15.74
6	5	Gga_rs16469464	14407916	T	C	0.3	-0.1	2.71133e-15	14.57
7	5	Gga_rs14517384	13849908	G	A	0.43	-0.09	1.73618e-14	13.76
8	5	GGaluGA276226	14531959	G	A	0.26	-0.09	2.93352e-13	12.53
9	5	GGaluGA276197	14473080	T	C	0.26	-0.09	4.42492e-13	12.35
10	5	GGaluGA276172	14431549	G	A	0.42	-0.08	4.91136e-13	12.31
11	5	Gga_rs16469270	14202564	G	A	0.47	-0.08	5.29959e-13	12.28
12	5	Gga_rs16470339	15066389	C	A	0.47	0.07	9.07233e-13	12.04
13	5	Gga_rs16469086	14001712	T	C	0.38	-0.08	1.62281e-12	11.79
14	5	Gga_rs14517594	14079566	A	G	0.27	-0.09	3.20399e-12	11.49
15	5	Gga_rs13757396	13360006	G	A	0.45	-0.08	6.02161e-12	11.22
16	5	Gga_rs13757427	13409605	C	T	0.29	-0.08	1.16254e-11	10.93
17	5	Gga_rs16468468	13606911	A	G	0.39	-0.08	1.93977e-11	10.71
18	5	Gga_rs14517618	14137667	C	T	0.21	-0.09	3.46127e-11	10.46
19	5	GGaluGA276407	15233877	C	T	0.29	-0.08	3.98561e-11	10.4
20	5	GGaluGA276229	14540648	T	C	0.4	-0.07	1.43821e-10	9.84
21	5	Gga_rs14516705	13190892	C	T	0.46	-0.08	1.52815e-10	9.82
22	5	Gga_rs14517517	13956355	A	G	0.49	-0.07	1.90219e-10	9.72
23	5	Gga_rs16469810	14704547	C	T	0.19	-0.09	2.40901e-10	9.62
24	5	Gga_rs16469229	14181377	A	G	0.11	-0.11	4.32923e-10	9.36
25	5	Gga_rs14515681	12358694	G	A	0.25	0.08	1.73057e-09	8.76
26	5	GGaluGA276491	15451320	C	T	0.47	-0.07	1.87911e-09	8.73
27	5	GGaluGA276207	14491149	C	A	0.18	-0.09	3.73524e-09	8.43
28	5	Gga_rs14516628	13102498	G	A	0.39	0.07	7.35987e-09	8.13
29	5	GGaluGA276473	15393096	G	A	0.44	0.06	1.02056e-08	7.99
30	5	GGaluGA275975	13986847	G	A	0.31	-0.07	1.208e-08	7.92
31	5	Gga_rs14515398	12126296	C	T	0.3	0.07	1.29123e-08	7.89
32	5	Gga_rs14517569	14036628	T	C	0.23	-0.07	1.30553e-08	7.88
33	5	Gga_rs14515376	12111979	G	A	0.3	0.07	1.59584e-08	7.8
34	5	Gga_rs10728596	15308620	G	A	0.29	0.07	2.20524e-08	7.66
35	5	Gga_rs14514941	11633187	T	C	0.34	0.06	5.71919e-08	7.24
36	5	Gga_rs14516672	13140853	G	T	0.4	0.06	7.99884e-08	7.1
37	5	GGaluGA277726	18649568	A	G	0.31	0.06	8.08861e-08	7.09
38	5	GGaluGA274797	10705954	A	G	0.37	0.06	1.13104e-07	6.95
39	5	GGaluGA277756	18720354	A	G	0.38	0.06	2.98795e-07	6.52
40	5	Gga_rs14514758	11194368	G	A	0.38	0.06	3.24914e-07	6.49
41	5	Gga_rs14721735	18899140	A	C	0.48	0.05	4.82443e-07	6.32
42	5	Gga_rs15675036	17816747	A	G	0.33	0.06	6.16366e-07	6.21
43	5	GGaluGA276112	14336021	A	G	0.14	0.08	7.55302e-07	6.12
44	5	Gga_rs16701284	15137583	A	G	0.37	-0.06	8.81635e-07	6.05
45	5	GGaluGA274875	11032268	A	G	0.46	0.05	9.1929e-07	6.04
46	5	Gga_rs14517445	13875201	G	A	0.4	-0.05	1.01421e-06	5.99
GWAS result of IMP trait
No.	Chr	SNP ID	Position (bp)	Allele 1	Allele 2	MAF	SNP effect(β)	p-value	-log10(p-value)
1	5	Gga_rs316338889	14370082	C	T	0.48	-3.12	1.62876e-16	15.79
2	5	Gga_rs16469464	14407916	T	C	0.3	3.16	5.54201e-13	12.26
3	5	GGaluGA276054	14218116	G	A	0.43	2.32	5.35961e-10	9.27
4	5	GGaluGA276059	14224765	G	A	0.28	2.61	6.29579e-10	9.2
5	5	Gga_rs10728596	15308620	G	A	0.3	-2.53	1.28799e-09	8.89
6	5	Gga_rs16470339	15066389	C	A	0.47	-2.17	4.71387e-09	8.33
7	5	Gga_rs16469270	14202564	G	A	0.47	2.24	4.87926e-09	8.31
8	5	GGaluGA276226	14531959	G	A	0.26	2.42	2.29108e-08	7.64
9	5	Gga_rs15667335	13904162	T	C	0.42	2.11	4.36735e-08	7.36
10	5	GGaluGA276172	14431549	G	A	0.42	2.13	4.94732e-08	7.31
11	5	GGaluGA276473	15393096	G	A	0.44	-2.13	4.96634e-08	7.3
12	5	GGaluGA276407	15233877	C	T	0.29	2.29	8.03073e-08	7.1
13	5	Gga_rs14517384	13849908	G	A	0.42	2.07	1.38763e-07	6.86
14	5	GGaluGA276757	16019367	T	C	0.15	2.79	1.64022e-07	6.79
15	5	GGaluGA276491	15451320	C	T	0.47	1.99	2.48348e-07	6.6
16	5	Gga_rs14517517	13956355	A	G	0.48	1.97	3.06613e-07	6.51
17	5	GGaluGA276259	14637136	A	G	0.37	1.98	4.11917e-07	6.39
GWAS result of hypoxanthine trait
No.	Chr	SNP ID	Position (bp)	Allele 1	Allele 2	MAF	SNP effect(β)	p-value	-log10(p-value)
1	5	Gga_rs316338889	14370082	C	T	0.47	0.11	1.52953e-09	8.82
* Abbreviation: Chr, Chromosome; Allele 1, Reference allele; Allele 2, Alternative allele; MAF, Minor allele frequency

## Sheet: Table S4
Table S4: Results of Gene ontology analysis conducted using 16 protein coding genes located in the significant genomic region.
Molecular function
ID	Description	GeneRatio	BgRatio	p-value	geneID
GO:0005179	hormone activity	2/6	32/1907	0.00392483	INS/IGF2
GO:0005102	signaling receptor binding	3/6	167/1907	0.0108228	INS/IGF2/TOLLIP
Biological process
ID	Description	GeneRatio	BgRatio	p-value	geneID
GO:0060048	cardiac muscle contraction	2/6	12/2047	0.000466627	TNNT3/TNNI2
GO:0006941	striated muscle contraction	2/6	15/2047	0.000739454	TNNT3/TNNI2
GO:0003015	heart process	2/6	18/2047	0.00107327	TNNT3/TNNI2
GO:0060047	heart contraction	2/6	18/2047	0.00107327	TNNT3/TNNI2
GO:0006006	glucose metabolic process	2/6	26/2047	0.00225605	INS/IGF2
GO:0019318	hexose metabolic process	2/6	27/2047	0.00243334	INS/IGF2
GO:0005996	monosaccharide metabolic process	2/6	30/2047	0.00300384	INS/IGF2
GO:0006936	muscle contraction	2/6	32/2047	0.00341609	TNNT3/TNNI2
GO:0003012	muscle system process	2/6	37/2047	0.0045569	TNNT3/TNNI2
GO:0003013	circulatory system process	2/6	38/2047	0.00480374	TNNT3/TNNI2
GO:0008015	blood circulation	2/6	38/2047	0.00480374	TNNT3/TNNI2
Cellular component
ID	Description	GeneRatio	BgRatio	p-value	geneID
GO:0005865	striated muscle thin filament	2/6	13/2130	0.000508938	TNNT3/TNNI2
GO:0036379	myofilament	2/6	13/2130	0.000508938	TNNT3/TNNI2
GO:0030017	sarcomere	2/6	44/2130	0.005936	TNNT3/TNNI2
GO:0044449	contractile fiber part	2/6	48/2130	0.00704231	TNNT3/TNNI2
GO:0030016	myofibril	2/6	53/2130	0.00854883	TNNT3/TNNI2
GO:0043292	contractile fiber	2/6	55/2130	0.00918933	TNNT3/TNNI2
GO:0005615	extracellular space	3/6	223/2130	0.0178207	INS/IGF2/TOLLIP
GO:0015629	actin cytoskeleton	2/6	80/2130	0.0189434	TNNT3/TNNI2
GO:0044421	extracellular region part	3/6	255/2130	0.0257361	INS/IGF2/TOLLIP
GO:0070062	extracellular exosome	1/6	13/2130	0.0361072	TOLLIP
GO:1903561	extracellular vesicle	1/6	14/2130	0.0388391	TOLLIP
GO:0043230	extracellular organelle	1/6	17/2130	0.046996	TOLLIP

## Sheet: Table S5
Table S5: Results of Gene ontology analysis conducted in the protein-protein interaction database of C5NT1AL gene.
No.	ID	Description	observed gene count	background gene count	strength	false discovery rate	matching proteins in the network
1	GO:0009117	Nucleotide metabolic process	10	305	1.66	1.11e-12	PNP,ITPA,ATIC,ADA,DUT,LOC770392,GMPR,DTYMK,UPP1,CMPK2
2	GO:1901135	Carbohydrate derivative metabolic process	10	680	1.32	5.98e-10	PNP,ITPA,ATIC,ADA,DUT,LOC770392,GMPR,DTYMK,UPP1,CMPK2
3	GO:0009123	Nucleoside monophosphate metabolic process	6	62	2.13	4.27e-09	ATIC,ADA,DUT,DTYMK,UPP1,CMPK2
4	GO:0034654	Nucleobase-containing compound biosynthetic process	9	526	1.38	4.75e-09	PNP,ITPA,ATIC,ADA,DUT,LOC770392,DTYMK,UPP1,CMPK2
5	GO:0034655	Nucleobase-containing compound catabolic process	7	184	1.73	1.21e-08	PNP,ITPA,ADA,DUT,LOC770392,NUDT12,UPP1
6	GO:1901293	Nucleoside phosphate biosynthetic process	7	184	1.73	1.21e-08	PNP,ATIC,ADA,DUT,DTYMK,UPP1,CMPK2
7	GO:0006139	Nucleobase-containing compound metabolic process	11	1869	0.92	4.62e-08	PNP,ITPA,ATIC,ADA,DUT,LOC770392,GMPR,NUDT12,DTYMK,UPP1,CMPK2
8	GO:0009200	Deoxyribonucleoside triphosphate metabolic process	4	12	2.67	1.18e-07	ITPA,DUT,DTYMK,CMPK2
9	GO:0034404	Nucleobase-containing small molecule biosynthetic process	5	64	2.04	2.71e-07	ITPA,ADA,DUT,LOC770392,UPP1
10	GO:0009165	Nucleotide biosynthetic process	6	180	1.67	4.14e-07	PNP,ATIC,DUT,DTYMK,UPP1,CMPK2
11	GO:0006221	Pyrimidine nucleotide biosynthetic process	4	27	2.32	1.42e-06	DUT,DTYMK,UPP1,CMPK2
12	GO:1901136	Carbohydrate derivative catabolic process	5	102	1.84	1.98e-06	PNP,ITPA,ADA,DUT,UPP1
13	GO:0072521	Purine-containing compound metabolic process	6	256	1.52	2.76e-06	PNP,ITPA,ATIC,ADA,LOC770392,GMPR
14	GO:0009211	Pyrimidine deoxyribonucleoside triphosphate metabolic process	3	5	2.93	4.22e-06	DUT,DTYMK,CMPK2
15	GO:0009124	Nucleoside monophosphate biosynthetic process	4	44	2.11	7.25e-06	ATIC,ADA,DUT,UPP1
16	GO:1901292	Nucleoside phosphate catabolic process	4	45	2.1	7.68e-06	ITPA,DUT,LOC770392,UPP1
17	GO:0009221	Pyrimidine deoxyribonucleotide biosynthetic process	3	7	2.78	8.33e-06	DUT,DTYMK,CMPK2
18	GO:0009119	Ribonucleoside metabolic process	4	52	2.04	1.2e-05	PNP,ADA,LOC770392,UPP1
19	GO:0044283	Small molecule biosynthetic process	6	357	1.37	1.56e-05	PNP,ITPA,ADA,DUT,LOC770392,UPP1
20	GO:0042454	Ribonucleoside catabolic process	3	15	2.45	4.21e-05	PNP,ADA,UPP1
21	GO:1901137	Carbohydrate derivative biosynthetic process	6	453	1.27	4.97e-05	ATIC,ADA,DUT,DTYMK,UPP1,CMPK2
22	GO:1901566	Organonitrogen compound biosynthetic process	7	955	1.01	0.00015	PNP,ATIC,ADA,DUT,DTYMK,UPP1,CMPK2
23	GO:0009156	Ribonucleoside monophosphate biosynthetic process	3	32	2.12	0.00027	ATIC,ADA,UPP1
24	GO:0072523	Purine-containing compound catabolic process	3	35	2.08	0.00034	PNP,ITPA,ADA
25	GO:0009166	Nucleotide catabolic process	3	36	2.07	0.00037	ITPA,DUT,UPP1
26	GO:0006227	dUDP biosynthetic process	2	2	3.15	0.00041	DTYMK,CMPK2
27	GO:0006233	dTDP biosynthetic process	2	2	3.15	0.00041	DTYMK,CMPK2
28	GO:0046128	Purine ribonucleoside metabolic process	3	44	1.98	0.00055	PNP,ADA,LOC770392
29	GO:1901564	Organonitrogen compound metabolic process	10	3708	0.58	0.00065	PNP,ITPA,ATIC,ADA,DUT,LOC770392,GMPR,DTYMK,UPP1,CMPK2
30	GO:0006235	dTTP biosynthetic process	2	4	2.85	0.00083	DTYMK,CMPK2
31	GO:0046102	Inosine metabolic process	2	4	2.85	0.00083	PNP,ADA
32	GO:0009204	Deoxyribonucleoside triphosphate catabolic process	2	5	2.75	0.0011	ITPA,DUT
33	GO:0009259	Ribonucleotide metabolic process	4	232	1.39	0.0017	ITPA,ATIC,GMPR,UPP1
34	GO:0046130	Purine ribonucleoside catabolic process	2	7	2.61	0.0018	PNP,ADA
35	GO:0046085	Adenosine metabolic process	2	10	2.45	0.0031	ADA,LOC770392
36	GO:0009130	Pyrimidine nucleoside monophosphate biosynthetic process	2	13	2.34	0.0048	DUT,UPP1
37	GO:1901565	Organonitrogen compound catabolic process	5	710	1	0.0071	PNP,ITPA,ADA,DUT,UPP1
38	GO:0006144	Purine nucleobase metabolic process	2	18	2.19	0.0081	ADA,GMPR
39	GO:0072529	Pyrimidine-containing compound catabolic process	2	18	2.19	0.0081	DUT,UPP1
40	GO:0009168	Purine ribonucleoside monophosphate biosynthetic process	2	19	2.17	0.0088	ATIC,ADA
41	GO:0072522	Purine-containing compound biosynthetic process	3	137	1.49	0.0103	PNP,ATIC,ADA
42	GO:0043094	Cellular metabolic compound salvage	2	23	2.09	0.0122	ADA,UPP1
43	GO:0009150	Purine ribonucleotide metabolic process	3	216	1.29	0.0365	ITPA,ATIC,GMPR
